# Supplementary material
Source: publisher site journal article supplement (https://www.dovepress.com/article/supplementary_file/612408/612408_Supplementary%20-%20revision1-clean%20version.docx)
Supplement: Supplementary file 1 [file 612408_Supplementary%20-%20revision1-clean%20version.docx]

**Table S1.** Demographic and clinical characteristics of the patients

| No. | Age | Gender | ICI type | ICISs | Cycles | Tumour | Onset (days) | Initial symptom | Muscles involved | | | | | | Onset-to-blood (days) | CK (U/L) | CK-MB (ng/ml) | hs-TnT (ng/ml) | AchR-Ab | Titin-Ab | MAP & Aab | Thigh MRI/CMR | EMG | UCG | ECG | CCTA/CAG |
| --- | --- | --- | --- | --- | --- | --- | --- | --- | --- | --- | --- | --- | --- | --- | --- | --- | --- | --- | --- | --- | --- | --- | --- | --- | --- | --- |
|  |  |  |  |  |  |  |  |  | E | B | N | L MRC grade | R | C |  |  |  |  |  |  |  |  |  |  |  |  |
| 1 | 69 | M | PD1 | P | 2 | Gastric cancer | 39 | Ptosis | √ |  |  | 5− | √ | √ | 7 | 7116 | 128.4 | 2.83 | NA | NA | ANA+, SSA+, SSB+ | NA | NEMG myopathaic changes, RNS (+), NCV (−) | LV RWMA  LVEF30% | RBBB |  |
| 2 | 79 | F | PD1 | T | 1 | Urothelial carcinoma | 34 | Ptosis | √ |  |  | 5− |  | √ | 4 | 2842 | 37.6 | 0.228 | − | − | ANA+, PM−SCL100+ | Partial muscle oedema | NCV, NEMG and RNS (−) | Diastolic dysfunction | SB, T wave changes, RBBB | Mild atherosclerosis, no stenosis |
| 3 | 61 | M | PDL1 | D | 2 | Cholangiocarcinoma | 32 | Neck muscle weakness | √ | √ | √ | 3+ | √ | √ | 12 | 1681 | 196 | 1.62 | − | + | Anti-myocardial Ab+ | NA | NEMG myopathaic changes, NCV (−) RNS (−) | Diastolic dysfunction | ST segment changes |  |
| 4 | 76 | M | PDL1 | A | 2 | HCC | 40 | Ptosis | √ |  |  | 5− | √ | √ | 13 | 2448 | 116 | 0.883 | + | − | ANA+ | NA | NCV (−), with no NEMG or RNS | Diastolic dysfunction | AF, ST segment changes, QTp |  |
| 5 | 64 | M | PD1 | T | 1 | HCC | 22 | Fatigue |  |  |  | 5− |  | √ | 8 | 3185 | 111.8 | 1.37 | NA | NA | NA | NA | NA | Normal | Normal |  |
| 6 | 69 | F | PD1 | Cr | 2 | Colon cancer | 20 | Ptosis | √ |  |  | 5− |  | √ | 7 | 3014 | 121 | 0.567 | − | + | RO-52 +, anti-myocardial Ab+ | Partial muscle oedema | NEMG myopathaic changes, NCV (−) RNS (−) | Diastolic dysfunction  GLS -20.3% | SB, I AVB, ST segment changes, ventricular fusion waves |  |
| 7 | 67 | F | PD1 | P | 2 | Pancreatic cancer | 61 | Ptosis | √ |  |  |  |  | √ | 11 | 558 | 21.5 | 0.403 | NA | NA | ANA+ | Crescentic LGE in the inferoseptal and mid‑inferior segments of the LVr wall. | NA | Normal | Atrial premature beats, LAB |  |
| 8 | 65 | F | PD1 | S | 1 | Cholangiocarcinoma | 30 | Chest distress |  |  |  |  |  | √ | 4 | 460 | 55.8 | 0.906 | NA | NA | NA | LGE in the mid‑myocardial layer of the mid‑inferior LV wall and T2WI hyperintensity in the LV apex. | NA | Normal  GLS -14.6% | RBBB |  |
| 9 | 66 | M | PD1 | S | 2 | HCC | 43 | Fatigue |  |  |  |  |  | √ | 6 | 1353 | 49.1 | 0.056 | NA | NA | NA | NA | NA | Normal | Ventricular pre-excitation |  |
| 10 | 82 | M | PD1 | T | 2 | Renal cell carcinoma | 24 | Ptosis | √ |  |  | 4+ |  | √ | 4 | 5437 | 204 | 3.71 | NA | NA | NA | NA | NA | LVEF 38%, diastolic dysfunction, LV RWMA | Tachycardia, I AVB, multitype ventricular premature beats, RBBB, LAB, ST segment changes, QTp |  |
| 11 | 67 | M | PD1 | S | 1 | HCC | Fourteen | Fatigue |  |  |  |  |  | √ | 9 | 430 | 86.1 | 4.03 | NA | NA | ANA+ | NA | NA | LVEF 38%, diastolic dysfunction | Dual-chamber pacing heart rate, STE | LAD mid 30‑40%, RCA mid 30% stenosis |
| 12 | 53 | M | PD1 | P | 6 | HCC | 100 | Fatigue |  | √ |  | 5− |  | √ | 33 | 2081 | 18.4 | 0.026 | NA | NA | NA | LGE in the lower wall of the LV | RNS (−), no NCV or NEMG | Normal | QTp |  |
| 13 | 56 | M | PD1+CTLA4 | Cd | 4 | Intrahepatic cholangiocarcinoma | 59 | Chest distress |  |  |  |  |  | √ | 1 | 388 | 26.6 | 0.171 | NA | NA | (−) | NA | NA | NA | NA | LM: calcified plaque, mild narrow |
| 14 | 86 | F | PD1 | S | 1 | Uterine cancer | 19 | Ptosis | √ |  |  | 5− |  | √ | 15 | 954 | 70.8 | 0.359 | NA | NA | NA | NA | NA | Diastolic dysfunction | SB, I AVB, RBBB |  |
| 15 | 78 | F | PD1 | P | 10 | Lung cancer | 231 | Fatigue |  |  |  |  |  | √ | 14 | 987 | 11.57 | 0.032 | NA | NA | NA | NA | NA | Normal | RBBB, QTp |  |
| 16 | 55 | M | PD1 | T | 8 | HCC | 186 | Fatigue |  |  |  |  |  | √ | 138 | 2121 | 10.3 | 0.041 | NA | NA | NA | NA | NA | Normal | IVCD |  |

Abbreviations: A: atezolizumab; AAb: autoimmune antibody; AchR-Ab: anti-acetylcholine receptor antibody; AF: Atrial fibrillation; B: bulbar; C: cardiac; Cd: camrelizumab; CK-MB: creatine kinase MB isoenzyme; CK: creatine kinase; CMR: cardiac magnetic resonance imaging; Cr: camrelizumab; D: duvalizumab; E: eye; ECG: electrocardiogram; EMG: electromyography; CCTA:coronary computed tomography angiography; CAG:Coronary angiography; F: female; HCC: hepatocellular carcinoma; hs-TnT: high-sensitivity troponin T; LGE:late gadolinium enhancement;GLS:global longit

udinal strain; I AVB: first-degree atrioventricular block; ICI: immune checkpoint inhibitor; IVCD: intraventricular conduction delay; L: limbs; LAB: left anterior fascicular block; LV RWMA: left ventricular regional wall motion abnormality; LVEF: left ventricular ejection fraction; M: male; MAP: myositis antibody panel; MRC: Medical Research Council; NA: not provided; NCV: nerve conduction; NEMG: needle electromyography; P: pembrolizumab; QTp: QT interval prolongation; R: respiratory; RBBB: right ventricular bundle branch block; RNS: repetitive frequency electrical stimulation; S: sindelizumab; SB: sinus bradycardia; STE: ST-segment elevation; T: tislelizumab; Titin-Ab: anti-titin antibody; UCG: echocardiography; LM:left main coronary artery; LAD:left anterior descending artery; RCA: right coronary artery;(+): abnormal; (−): not finding abnormal result; √:this region was involved.

**Table S2. Echocardiographic findings in all patients.**

| **No.** | **Time** | **Echocardiographic Parameters** | | | | |
| --- | --- | --- | --- | --- | --- | --- |
|  |  | **LVEF（%）** | **E/A** | **E/e’** | **RWMA** | **Others** |
| P1 | Baseline | 67 | 0.7 | NA | (-) |  |
|  | Onset-Steroid | 30 | 1.8 | NA | Dyssynchronous motion: basal‑to‑apical septum, anterior wall, mid‑to‑apical lateral wall | Estimated PASP 38 mmHg |
|  | Steroid-Discharge | 50 | 0.8 | NA | Dyssynchronous motion: basal‑to‑apical inferior wall, mid‑to‑apical posterior wall |  |
| P2 | Baseline | NA | NA | NA | NA |  |
|  | Onset-Steroid | 65 | 0.6 | 10.9 | (-) |  |
|  | Steroid-  Discharge | 67 | 0.6 | 12.2 | (-) |  |
| P3 | Baseline | NA | NA | NA | NA |  |
|  | Onset-  Steroid | 65 | 0.5 | 5.2 | (-) |  |
|  | Steroid-Discharge | 62 | 0.7 | 7.1 | (-) |  |
| P4 | Baseline | NA | NA | NA | NA |  |
|  | Onset-Steroid | 60 | NA | 10.8 | (-) |  |
|  | Steroid-Discharge | 60 | NA | 15.1 | (-) |  |
| P5 | Baseline | 69 | 0.8 | NA | (-) |  |
|  | Onset-Steroid | 64 | 0.7 | 5.7 | (-) |  |
|  | Steroid-Discharge | 65 | 0.5 | 6.3 | (-) |  |
| P6 | Baseline | 65 | 0.9 | 7.3 | (-) | GLS-20.3% |
|  | Onset-Steroid | 60 | 0.7 | 8.9 | (-) |  |
|  | Steroid-Discharge | 65 | 0.7 | 8.8 | (-) |  |
| P7 | Baseline | NA | NA | NA | NA |  |
|  | Onset-Steroid | 64 | 0.8 | 11.3 | (-) |  |
|  | Steroid-Discharge | 64 | 0.6 | 7.6 | (-) |  |
| P8 | Baseline | NA | NA | NA | NA |  |
|  | Onset-Steroid | 62 | 0.6 | 5.9 | (-) | GLS-14.6%，TAPSE 13mm |
|  | Steroid-Discharge | 65 | 0.6 | 5.6 | (-) |  |
| P9 | Baseline | NA | NA | NA | NA |  |
|  | Onset-Steroid | 55 | 0.5 | 5.4 | (-) |  |
|  | Steroid-Discharge | 57 | 0.7 | 7.3 | (-) |  |
| P10 | Baseline | NA | NA | NA | NA |  |
|  | Onset-Steroid | 38 | 0.4 | 6 | Global hypokinesis with preserved basal motion of inferior, posterior, and lateral walls |  |
|  | Steroid-Death | NA | NA | NA | NA |  |
| P11 | Baseline | NA | NA | NA | NA |  |
|  | Onset-Steroid | 38 | 0.9 | 14.8 | Generalized left ventricular systolic hypokinesis |  |
|  | Steroid-Death | 30 | NA | 8.8 | Generalized left ventricular systolic hypokinesis |  |
| P12 | Baseline | 60 | 0.9 | 6.6 | (-) |  |
|  | Onset-Steroid | 60 | 1 | 5.1 | (-) |  |
|  | Steroid-Discharge | NA | NA | NA | NA |  |
| P13 | Baseline | 60 | 0.7 | 6.9 | (-) |  |
|  | Onset-Steroid | 70 | 0.6 | 5.4 | (-) |  |
|  | Steroid-Discharge | NA | NA | NA | NA |  |
| P14 | Baseline | 65 | 0.5 | 19.2 | (-) |  |
|  | Onset-Steroid | 64 | 0.5 | 8.4 | (-) |  |
|  | Steroid-Discharge | 58 | 0.6 | 10.7 | (-) |  |
| P15 | Baseline | NA | 0.6 | NA | (-) |  |
|  | Onset-Steroid | 60 | 0.8 | NA | (-) |  |
|  | Steroid-Discharge | 63 | 0.5 | NA | (-) |  |
| P16 | Baseline | 64 | 1.2 | 10.5 | (-) |  |
|  | Onset-Steroid | 65 | 0.8 | 5.8 | (-) |  |
|  | Steroid-Discharge | 65 | 0.6 | 5.9 | (-) |  |

*Abbreviations*: P, patient; E/A, early‑to‑late diastolic mitral inflow velocity ratio; E/e', ratio of early mitral inflow velocity to early diastolic mitral annular velocity; GLS, global longitudinal strain; RWMA, regional wall motion abnormality; PASP, pulmonary artery systolic pressure; TAPSE, tricuspid annular plane systolic excursion; (-), normal; NA, not available.

**Figure.S1 Electrocardiograms of all patients**

ECGs were recorded at the following time points: pre‑onset baseline, from onset to CK‑MB peak, and from treatment initiation (or CK‑MB rebound) to clinical improvement or death.

Abbreviations: NA, not available; P, patient; Pre‑Onset Baseline, baseline ECG before disease onset; Onset to CK‑MB Peak, ECG between symptom onset and CK‑MB peak; Treatment/Rebound to Improvement/Death, ECG during the interval from corticosteroid initiation (patients without CK-MB rebound) or from CK‑MB rebound (patients with CK-MB rebound) to clinical improvement with discharge or death.
